# Supplementary material
Source: Springer Nature journal article supplement (https://www.springermedizin.de/resource/supplementary/12885_2010_2426_MOESM3_ESM.pdf/9461264)

# Replicate Correlation

Brain

Lung

H1242

L17

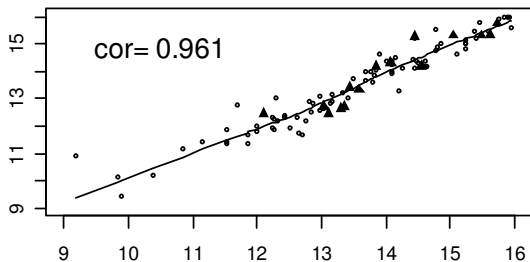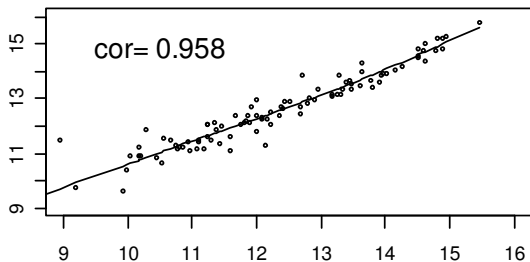

H1343

L44

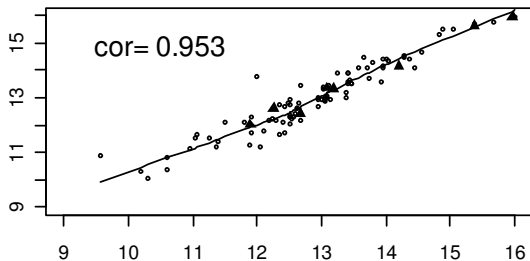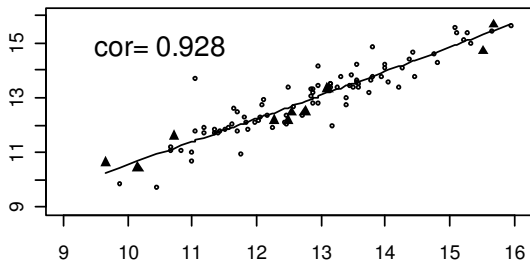

H1443

L45

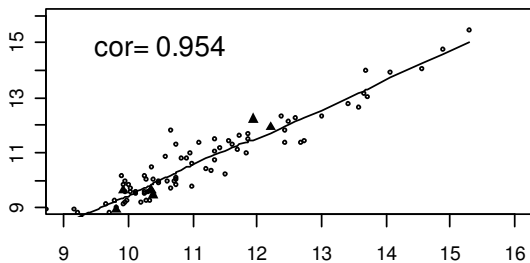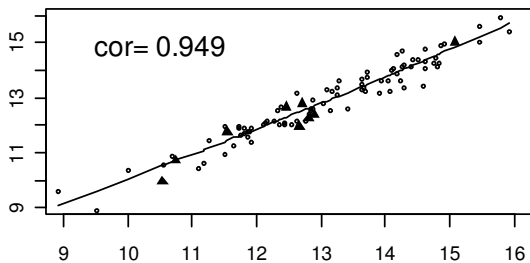

H1564

L48

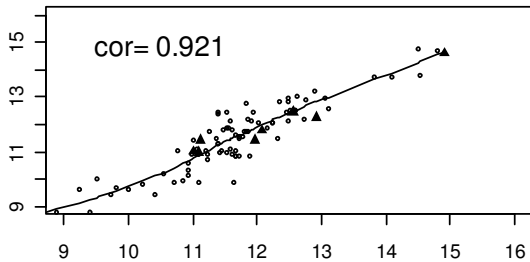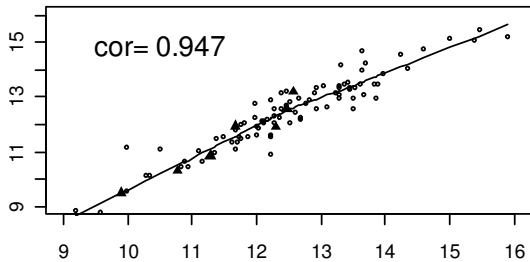

H1587

L57

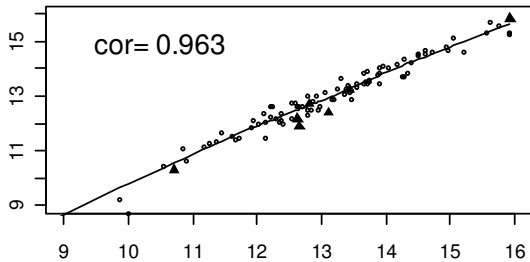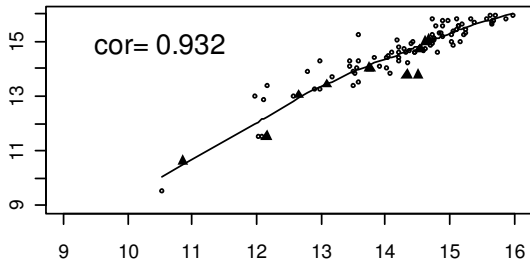

Replicate 2

Replicate 1

Supplement: MOESM3 [file 9461264]
